# Supplementary material for: Identification and Expression Analysis of R2R3-MYB Transcription Factors Associated with Flavonoid Biosynthesis in Panax quinquefolius
Source: Int J Mol Sci. 2024 Mar 26;25(7):3709. doi: 10.3390/ijms25073709 (PMC11011825; doi:10.3390/ijms25073709)
Supplement: Supplementary file 1 [file ijms-25-03709-s001.zip › Supplementary tables.xlsx]

## Sheet: Table S1
Table S1 R2R3-MYB members of P. quinquefolius rename
ID	Rename
q10161.t1	PqMYB1
q10713.t1	PqMYB2
q10988.t1	PqMYB3
q11580.t1	PqMYB4
q11622.t1	PqMYB5
q11934.t1	PqMYB6
q14740.t1	PqMYB7
q1485.t1	PqMYB8
q14873.t1	PqMYB9
q15102.t1	PqMYB10
q15296.t1	PqMYB11
q15530.t1	PqMYB12
q17773.t1	PqMYB13
q18475.t1	PqMYB14
q18573.t1	PqMYB15
q18611.t1	PqMYB16
q18742.t1	PqMYB17
q19189.t1	PqMYB18
q19513.t1	PqMYB19
q19671.t1	PqMYB20
q20082.t1	PqMYB21
q20105.t1	PqMYB22
q20412.t1	PqMYB23
q21403.t1	PqMYB24
q22464.t1	PqMYB25
q22938.t1	PqMYB26
q23258.t1	PqMYB27
q23363.t1	PqMYB28
q23461.t1	PqMYB29
q24334.t1	PqMYB30
q24530.t1	PqMYB31
q24709.t1	PqMYB32
q24909.t1	PqMYB33
q25150.t1	PqMYB34
q25321.t1	PqMYB35
q25327.t1	PqMYB36
q25908.t1	PqMYB37
q26141.t1	PqMYB38
q26923.t1	PqMYB39
q26988.t1	PqMYB40
q27957.t1	PqMYB41
q28108.t1	PqMYB42
q28288.t1	PqMYB43
q28353.t1	PqMYB44
q28694.t1	PqMYB45
q29708.t1	PqMYB46
q30290.t1	PqMYB47
q30299.t1	PqMYB48
q31540.t1	PqMYB49
q3188.t1	PqMYB50
q32363.t1	PqMYB51
q32733.t1	PqMYB52
q32734.t1	PqMYB53
q33011.t1	PqMYB54
q33123.t1	PqMYB55
q33539.t1	PqMYB56
q33557.t1	PqMYB57
q33841.t1	PqMYB58
q3402.t1	PqMYB59
q34878.t1	PqMYB60
q34991.t1	PqMYB61
q35333.t1	PqMYB62
q35897.t1	PqMYB63
q37344.t1	PqMYB64
q37670.t1	PqMYB65
q38154.t1	PqMYB66
q39182.t1	PqMYB67
q39373.t1	PqMYB68
q39868.t1	PqMYB69
q4009.t1	PqMYB70
q40616.t1	PqMYB71
q41241.t1	PqMYB72
q41445.t1	PqMYB73
q43295.t1	PqMYB74
q43483.t1	PqMYB75
q43749.t1	PqMYB76
q43759.t1	PqMYB77
q43921.t1	PqMYB78
q44472.t1	PqMYB79
q44539.t1	PqMYB80
q4499.t1	PqMYB81
q45138.t1	PqMYB82
q45168.t1	PqMYB83
q4613.t1	PqMYB84
q46928.t1	PqMYB85
q46935.t1	PqMYB86
q46965.t1	PqMYB87
q47084.t1	PqMYB88
q47277.t1	PqMYB89
q47421.t1	PqMYB90
q47449.t1	PqMYB91
q4751.t1	PqMYB92
q47546.t1	PqMYB93
q47746.t1	PqMYB94
q47869.t1	PqMYB95
q48214.t1	PqMYB96
q49505.t1	PqMYB97
q49697.t1	PqMYB98
q499.t1	PqMYB99
q50015.t1	PqMYB100
q50632.t1	PqMYB101
q50739.t1	PqMYB102
q51533.t1	PqMYB103
q51607.t1	PqMYB104
q51609.t1	PqMYB105
q52191.t1	PqMYB106
q52458.t1	PqMYB107
q52702.t1	PqMYB108
q53898.t1	PqMYB109
q54222.t1	PqMYB110
q54554.t1	PqMYB111
q5473.t1	PqMYB112
q55058.t1	PqMYB113
q55372.t1	PqMYB114
q55679.t1	PqMYB115
q55727.t1	PqMYB116
q55861.t1	PqMYB117
q56157.t1	PqMYB118
q56964.t1	PqMYB119
q57810.t1	PqMYB120
q58122.t1	PqMYB121
q58202.t1	PqMYB122
q58468.t1	PqMYB123
q59167.t1	PqMYB124
q59761.t1	PqMYB125
q59965.t1	PqMYB126
q5997.t1	PqMYB127
q6001.t1	PqMYB128
q60055.t1	PqMYB129
q60061.t1	PqMYB130
q60468.t1	PqMYB131
q61452.t1	PqMYB132
q6186.t1	PqMYB133
q6187.t1	PqMYB134
q62249.t1	PqMYB135
q62497.t1	PqMYB136
q62843.t1	PqMYB137
q62874.t1	PqMYB138
q63082.t1	PqMYB139
q63396.t1	PqMYB140
q63418.t1	PqMYB141
q64215.t1	PqMYB142
q64331.t1	PqMYB143
q64514.t1	PqMYB144
q64627.t1	PqMYB145
q64788.t1	PqMYB146
q64841.t1	PqMYB147
q64866.t1	PqMYB148
q64911.t1	PqMYB149
q65064.t1	PqMYB150
q65700.t1	PqMYB151
q65983.t1	PqMYB152
q66346.t1	PqMYB153
q66485.t1	PqMYB154
q7053.t1	PqMYB155
q780.t1	PqMYB156
q8251.t1	PqMYB157
q8256.t1	PqMYB158
q8760.t1	PqMYB159

## Sheet: Table S2
Table S2 Analysis of physical and chemical properties of PqMYBs
Number	MW	PI	Amino acid (aa)		chr
PqMYB1	36305	7.01		314	chr8
PqMYB2	25262.5	9.15		223	chr8
PqMYB3	53580.7	6.44		477	chr23
PqMYB4	34294.8	5.61		301	chr23
PqMYB5	12211.9	9.33		107	chr23
PqMYB6	27163.5	6.97		235	chr23
PqMYB7	37643.3	6.42		333	chr3
PqMYB8	38612.3	8.35		340	chr14
PqMYB9	29400.7	5		254	chr3
PqMYB10	23440.8	6.22		204	chr3
PqMYB11	25837.4	6.18		221	chr3
PqMYB12	17558.2	9.84		152	chr3
PqMYB13	21567.2	9.3		189	chr9
PqMYB14	32342.9	6.2		280	chr9
PqMYB15	31922.3	9.1		279	chr9
PqMYB16	51397	6.19		455	chr9
PqMYB17	24050.2	8.49		208	chr9
PqMYB18	40979.5	5.71		362	chr12
PqMYB19	33264.6	6.25		291	chr12
PqMYB20	29345.8	6.76		255	chr12
PqMYB21	101079	9.74		890	chr12
PqMYB22	105524	5.29		954	chr12
PqMYB23	30447.7	5.07		268	chr12
PqMYB24	35825.2	5.13		320	chr12
PqMYB25	35872.2	5.15		324	chr4
PqMYB26	29377.9	8.12		254	chr4
PqMYB27	44370.4	6.8		405	chr4
PqMYB28	20135	9.95		174	chr4
PqMYB29	57449.4	5.25		521	chr4
PqMYB30	32025.2	5.03		288	chr4
PqMYB31	53579.7	5.58		493	chr4
PqMYB32	66940	9.7		599	chr13
PqMYB33	32548.9	5.22		289	chr13
PqMYB34	37595.2	6.75		331	chr13
PqMYB35	31606.2	5.11		273	chr13
PqMYB36	35751.4	5.13		312	chr13
PqMYB37	26975	5.91		237	chr13
PqMYB38	114328	5.31		1031	chr13
PqMYB39	36138.1	5.62		322	chr13
PqMYB40	26947.9	9.76		238	chr13
PqMYB41	38622.1	9.21		350	chr19
PqMYB42	26094.7	6.45		224	chr19
PqMYB43	48461.2	5.73		425	chr19
PqMYB44	31100.9	5.79		268	chr19
PqMYB45	37695.4	6.27		333	chr19
PqMYB46	30930.8	9.21		272	chr19
PqMYB47	34863.5	5.78		310	chr15
PqMYB48	70946.5	8.82		642	chr15
PqMYB49	47434.1	6.44		415	chr15
PqMYB50	116212	5.2		1050	chr24
PqMYB51	28373.5	5.3		252	chrUN
PqMYB52	41133.2	5.27		364	chr5
PqMYB53	40858.3	5.54		361	chr5
PqMYB54	74027.5	6.21		656	chr5
PqMYB55	29279.7	7.68		254	chr5
PqMYB56	115826	8.98		1022	chr5
PqMYB57	108396	5.22		979	chr5
PqMYB58	30413.7	5.07		268	chr5
PqMYB59	27062.1	6.07		237	chr24
PqMYB60	82840.8	7.21		751	chr5
PqMYB61	32048.3	6.72		287	chr5
PqMYB62	39814.5	6.262		353	chr5
PqMYB63	49835.7	5.96		453	chr21
PqMYB64	26386.5	6.61		229	chr21
PqMYB65	35362.1	6		310	chr21
PqMYB66	54819.8	6.62		488	chr21
PqMYB67	34408.2	7.57		298	chr17
PqMYB68	59953.6	5.19		549	chr17
PqMYB69	36513.9	6.37		322	chr17
PqMYB70	33039.8	5.73		291	chr24
PqMYB71	26487.4	8.93		234	chr17
PqMYB72	26247.6	9.27		233	chr7
PqMYB73	32177.7	8.28		289	chr7
PqMYB74	33277.8	6.6		300	chr7
PqMYB75	39250.2	6.67		347	chrUN
PqMYB76	51455.1	6.33		456	chr1
PqMYB77	25069.7	10.34		220	chr1
PqMYB78	32212.8	6.12		279	chr1
PqMYB79	27569.5	5.21		239	chr1
PqMYB80	31377	8.99		270	chr1
PqMYB81	31793.1	5.94	283	283	chrUN
PqMYB82	116197	5.33	1027	1027	chr1
PqMYB83	27454.6	9.15	239	239	chr1
PqMYB84	26257.5	9.27	233	233	chrUN
PqMYB85	41972.2	5.63	370	370	chr6
PqMYB86	21924.7	9.3	193	193	chr6
PqMYB87	39734.4	8.43	346	346	chr6
PqMYB88	27640.7	8.19	244	244	chr6
PqMYB89	23652.7	9.49	211	211	chr6
PqMYB90	38121.9	5.86	343	343	chr6
PqMYB91	29262	9.45	262	262	chr6
PqMYB92	44417.5	6.02	395	395	chrUN
PqMYB93	16761.1	10.25	145	145	chr6
PqMYB94	30138.6	9.71	277	277	chr6
PqMYB95	30082.6	5.2	263	263	chr6
PqMYB96	34925	6.49	310	310	chr6
PqMYB97	27746.8	8.71	234	234	chr6
PqMYB98	31956.5	8.57	280	280	chr6
PqMYB99	36159.2	5.93	322	322	chr14
PqMYB100	67302.9	8.42	600	600	chrUN
PqMYB101	32487.4	8.66	297	297	chr20
PqMYB102	39844.5	7.08	353	353	chr20
PqMYB103	46682.6	5.37	415	415	chr20
PqMYB104	28759.8	4.66	259	259	chr20
PqMYB105	27923.8	6.45	243	243	chr20
PqMYB106	49550.5	5.99	434	434	chr20
PqMYB107	33705.4	6.71	301	301	chr20
PqMYB108	37601.7	5.81	332	332	chr20
PqMYB109	48454.1	6.6	425	425	chr16
PqMYB110	38556.6	8.8	348	348	chr16
PqMYB111	33616.4	5.27	297	297	chr16
PqMYB112	49561.4	6.33	449	449	chr11
PqMYB113	33489.9	6.39	304	304	chr16
PqMYB114	26917.4	5.38	236	236	chr10
PqMYB115	44594.2	4.58	401	401	chr10
PqMYB116	30725.9	5.51	267	267	chr10
PqMYB117	116439	5.25	1028	1028	chr10
PqMYB118	29492.2	8.12	254	254	chr10
PqMYB119	62973.2	5.11	569	569	chr10
PqMYB120	38413.9	6.27	354	354	chr10
PqMYB121	32430.3	8.66	297	297	chr18
PqMYB122	39754.3	6.72	352	352	chr18
PqMYB123	18597.1	9.37	164	164	chr18
PqMYB124	26936.3	8.7	241	241	chr18
PqMYB125	43307.7	6.33	381	381	chr18
PqMYB126	33552.2	7.06	300	300	chr18
PqMYB127	41345.6	9.36	358	358	chr11
PqMYB128	63310.5	7.16	574	574	chr11
PqMYB129	40650.2	9.49	351	351	chr18
PqMYB130	64211.6	8.92	578	578	chr18
PqMYB131	35861.1	6.46	318	318	chr18
PqMYB132	23323.9	7.58	203	203	chr2
PqMYB133	24238.7	9.13	206	206	chr11
PqMYB134	24238.7	9.13	206	206	chr11
PqMYB135	78332.5	4.72	718	718	chr2
PqMYB136	43950.7	9.1	386	386	chr2
PqMYB137	41728.7	6.8	383	383	chr2
PqMYB138	44254.3	6.09	405	405	chr2
PqMYB139	22774.2	8.67	200	200	chr2
PqMYB140	42463.3	6.56	390	390	chr2
PqMYB141	49157.7	8.05	450	450	chr2
PqMYB142	42136.3	5.75	372	372	chr22
PqMYB143	23945.1	9.51	209	209	chr22
PqMYB144	21118.9	9.24	187	187	chr22
PqMYB145	30731.3	9.24	282	282	chr22
PqMYB146	26480.4	7.76	229	229	chr22
PqMYB147	42896.1	5.66	390	390	chr22
PqMYB148	37395.2	5.86	337	337	chr22
PqMYB149	29948.6	7.65	265	265	chr22
PqMYB150	29353.9	5.37	256	256	chr22
PqMYB151	36314.9	9.41	315	315	chr22
PqMYB152	19518.7	9.3	175	175	chr22
PqMYB153	27786.9	9.09	234	234	chr22
PqMYB154	31638.2	8.25	276	276	chr22
PqMYB155	38685.3	8.5	340	340	chr11
PqMYB156	16734	10.16	144	144	chr14
PqMYB157	66529.3	4.91	596	596	chr11
PqMYB158	36105.7	6.76	319	319	chr11
PqMYB159	34892.4	5.63	310	310	chr8

## Sheet: Table S3
Table S3 The gene replication mode of PqMYBs			0 stands for singleton duplications		SL	DSD	PD	TD	SD
Name	Gene replication mode		1stands for dispersed duplications		126	5	2	24	2
PqMYB1	4		2 stands for proximalduplications
PqMYB2	4		3 stands for tandem duplications
PqMYB3	4		4 stands for segmental duplications
PqMYB4	4
PqMYB5	1
PqMYB6	4
PqMYB7	4
PqMYB8	4
PqMYB9	4
PqMYB10	4
PqMYB11	4
PqMYB12	4
PqMYB13	4
PqMYB14	4
PqMYB15	4
PqMYB16	4
PqMYB17	4
PqMYB18	4
PqMYB19	4
PqMYB20	0
PqMYB21	4
PqMYB22	4
PqMYB23	4
PqMYB24	4
PqMYB25	4
PqMYB26	4
PqMYB27	4
PqMYB28	1
PqMYB29	1
PqMYB30	4
PqMYB31	4
PqMYB32	1
PqMYB33	4
PqMYB34	4
PqMYB35	4
PqMYB36	4
PqMYB37	4
PqMYB38	4
PqMYB39	4
PqMYB40	4
PqMYB41	4
PqMYB42	4
PqMYB43	4
PqMYB44	4
PqMYB45	4
PqMYB46	1
PqMYB47	4
PqMYB48	4
PqMYB49	4
PqMYB50	4
PqMYB51	1
PqMYB52	4
PqMYB53	3
PqMYB54	4
PqMYB55	0
PqMYB56	4
PqMYB57	4
PqMYB58	4
PqMYB59	4
PqMYB60	3
PqMYB61	4
PqMYB62	1
PqMYB63	4
PqMYB64	4
PqMYB65	4
PqMYB66	4
PqMYB67	4
PqMYB68	1
PqMYB69	4
PqMYB70	4
PqMYB71	4
PqMYB72	4
PqMYB73	4
PqMYB74	4
PqMYB75	1
PqMYB76	4
PqMYB77	4
PqMYB78	4
PqMYB79	4
PqMYB80	4
PqMYB81	4
PqMYB82	1
PqMYB83	1
PqMYB84	1
PqMYB85	4
PqMYB86	4
PqMYB87	4
PqMYB88	4
PqMYB89	4
PqMYB90	4
PqMYB91	4
PqMYB92	1
PqMYB93	4
PqMYB94	2
PqMYB95	4
PqMYB96	4
PqMYB97	4
PqMYB98	4
PqMYB99	4
PqMYB100	1
PqMYB101	4
PqMYB102	4
PqMYB103	4
PqMYB104	4
PqMYB105	2
PqMYB106	4
PqMYB107	4
PqMYB108	1
PqMYB109	4
PqMYB110	1
PqMYB111	4
PqMYB112	4
PqMYB113	4
PqMYB114	4
PqMYB115	4
PqMYB116	4
PqMYB117	1
PqMYB118	4
PqMYB119	1
PqMYB120	4
PqMYB121	4
PqMYB122	4
PqMYB123	1
PqMYB124	3
PqMYB125	4
PqMYB126	4
PqMYB127	4
PqMYB128	4
PqMYB129	4
PqMYB130	4
PqMYB131	4
PqMYB132	4
PqMYB133	3
PqMYB134	3
PqMYB135	1
PqMYB136	1
PqMYB137	4
PqMYB138	4
PqMYB139	4
PqMYB140	4
PqMYB141	4
PqMYB142	4
PqMYB143	4
PqMYB144	4
PqMYB145	4
PqMYB146	4
PqMYB147	1
PqMYB148	4
PqMYB149	4
PqMYB150	4
PqMYB151	4
PqMYB152	1
PqMYB153	4
PqMYB154	4
PqMYB155	1
PqMYB156	4
PqMYB157	4
PqMYB158	4
PqMYB159	4

## Sheet: Table S4
Table S4 The Ka/Ks results of duplicated PqMYBs
Sequence	Ka/Ks	Length
q10161.t1-q31540.t1	0.193965	939
q10161.t1-q53898.t1	0.155282	927
q14740.t1-q48214.t1	0.215159	912
q15296.t1-q47546.t1	0.193583	423
q15296.t1-q64788.t1	0.375212	654
q18611.t1-q10988.t1	0.538448	1335
q18611.t1-q38154.t1	0.480933	1365
q20412.t1-q24909.t1	0.17277	795
q22464.t1-q55679.t1	0.348246	972
q24530.t1-q57810.t1	0.703673	1062
q25150.t1-q4009.t1	0.330446	870
q25327.t1-q39182.t1	0.292125	867
q26141.t1-q3188.t1	0.602007	3078
q28108.t1-q64788.t1	0.44328	666
q30290.t1-q55058.t1	0.22232	876
q31540.t1-q53898.t1	0.194586	1218
q32363.t1-q24909.t1	0.228281	753
q32734.t1-q19189.t1	0.177724	1080
q34991.t1-q21403.t1	0.544286	834
q37344.t1-q11934.t1	2.13424	687
q37670.t1-q11580.t1	0.424575	894
q41241.t1-q10713.t1	0.100928	669
q43295.t1-q30290.t1	0.205457	876
q43295.t1-q8760.t1	0.218532	876
q43749.t1-q18611.t1	0.590108	1338
q44539.t1-q17773.t1	0.598838	564
q4499.t1-q52191.t1	0.223675	849
q4499.t1-q59761.t1	0.238171	849
q47277.t1-q64514.t1	0.29565	561
q47546.t1-q28108.t1	0.235904	435
q47546.t1-q64788.t1	0.795972	435
q47869.t1-q65064.t1	0.45369	768
q48214.t1-q28694.t1	0.221184	915
q49697.t1-q66485.t1	0.124303	828
q5473.t1-q35897.t1	0.335578	1347
q58122.t1-q50632.t1	0.285097	891
q58202.t1-q50739.t1	0.511086	1053
q59167.t1-q51607.t1	0.411159	561
q59965.t1-q52458.t1	1.09131	900
q5997.t1-q60055.t1	0.211014	1047
q6001.t1-q60061.t1	0.330366	1632
q61452.t1-q39182.t1	0.339416	609
q63082.t1-q40616.t1	0.654354	567

## Sheet: Table S5
Table S5 The number of cis-acting elements of PqMYB genes
Element	Number
WUN-motif	282
ABRE4	179
ACE	71
Box 4	1478
STRE	514
ARE	424
GT1-motif	392
MYB	1360
CAAT-box	11955
G-box	721
ABRE	655
ABRE3a	179
TATA-box	25963
TCA	182
MYB-like sequence	395
MYC	1165
TCT-motif	306
RY-element	46
TCA-element	163
CARE	34
GATA-motif	176
GCN4_motif	69
AAGAA-motif	424
MSA-like	10
W box	279
MYB recognition site	64
CCAAT-box	64
Sp1	40
circadian	80
CAT-box	124
LTR	132
CGTCA-motif	421
TATA	415
TATC-box	62
AT-rich element	71
F-box	42
as-1	421
AT-rich sequence	42
re2f-1	1
TGACG-motif	421
O2-site	148
ERE	594
WRE3	196
AP-1	22
P-box	102
MBS	187
ACTCATCCT sequence	7
MRE	115
ATCT-motif	67
CCGTCC motif	92
box S	19
A-box	93
Box III	13
CCGTCC-box	92
I-box	138
LAMP-element	39
AE-box	98
chs-CMA2b	101
Box II	13
chs-CMA2a	30
TCCC-motif	99
Myb-binding site	395
GA-motif	63
TC-rich repeats	118
dOCT	14
chs-CMA1a	101
AT1-motif	34
AuxRR-core	48
TGA-element	187
MBSI	24
GARE-motif	67
HD-Zip 1	62
ATC-motif	38
AuxRE	5
AACA_motif	9
DRE1	27
NON	6
AC-I	21
Box II -like sequence	5
GC-motif	40
CAG-motif	6
GTGGC-motif	7
Gap-box	20
DRE core	28
CTAG-motif	35
HD-Zip 3	11
JERE	3
3-AF1 binding site	20
AT~ABRE	6
C-box	1
H-box	3
L-box	4
3-AF3 binding site	8
GC-repeat	1
ACA-motif	4
TGA-box	7
GATT-motif	5
sbp-CMA1c	1
4cl-CMA2b	1
4cl-CMA1c	1
motif I	2
AC-II	1
GRA	1
AAAC-motif	6
chs-Unit 1 m1	2
OCT	1
HMG-TATA-region	1
5UTR Py-rich stretch	2
E2Fb	3
Pc-CMA2a	1
4cl-CMA1b	1
ABRE2	1
telo-box	1
chs-CMA2c	2

## Sheet: Table S6
Table S6 Different tissues expression levels in PqMYBs
Name	Flower	Leaf	Rooot
PqMYB1	0.112232	0.381759	0.115422
PqMYB2	10.7417	7.20767	9.78489
PqMYB3	3.40506	1.72018	1.22103
PqMYB4	2.71337	1.23083	9.86627
PqMYB5	2.25918	0.517044	0
PqMYB6	0.535238	1.5601	40.9038
PqMYB7	0	0	1.54516
PqMYB8	0	0	0.657228
PqMYB9	1.8991	1.17294	4.99944
PqMYB10	7.18453	0	0
PqMYB11	0.023461	0	0.125514
PqMYB12	0	0	0.298962
PqMYB13	0	0	5.24319
PqMYB14	6.04268	0.526726	3.53876
PqMYB15	4.33267	0.0789543	0.138435
PqMYB16	2.04179	0.345983	1.00516
PqMYB17	11.0521	10.2655	2.80694
PqMYB18	0.349583	1.26929	0.0884017
PqMYB19	0	0	0
PqMYB20	0.0582437	0.154422	1.3978
PqMYB21	9.4626	6.43032	5.09228
PqMYB22	6.57228	1.32866	2.13216
PqMYB23	2.62444	0.153184	1.23252
PqMYB24	0.038177	0.199236	2.83446
PqMYB25	0.31176	0.671965	0
PqMYB26	2.04558	5.49185	20.2184
PqMYB27	1.65818	0.765041	1.30547
PqMYB28	3.18215	2.68449	1.45468
PqMYB29	2.96552	1.61603	1.34449
PqMYB30	6.2418	0.147037	2.12566
PqMYB31	0.571364	0.187386	0.17445
PqMYB32	0.0525107	0.0154887	0
PqMYB33	1.56198	0.0831557	0.558072
PqMYB34	0	0	0.042742
PqMYB35	0	0	0.193683
PqMYB36	0.177928	0.911636	2.13559
PqMYB37	0.0252307	0	1.72458
PqMYB38	2.01882	0.400327	1.05348
PqMYB39	1.07729	0.0450663	0.049043
PqMYB40	0.224546	0.0159277	0.0669503
PqMYB41	15.4979	24.8347	17.486
PqMYB42	0	0	0.087099
PqMYB43	0.0278143	0.095967	0.012781
PqMYB44	2.77033	2.67007	2.68488
PqMYB45	0	0	1.02938
PqMYB46	7.54919	2.81219	23.0082
PqMYB47	14.5585	1.00333	0.517947
PqMYB48	0.412464	0	0.034623
PqMYB49	0.374776	0.774386	0.0304323
PqMYB50	4.39934	1.25817	2.73466
PqMYB51	3.34459	0.881037	0
PqMYB52	0.0169267	0.163375	0
PqMYB53	0.713969	0.0677157	0.36199
PqMYB54	0.155817	0.108836	6.28871
PqMYB55	4.61249	1.76346	4.27449
PqMYB56	7.43523	1.98711	1.78503
PqMYB57	1.73378	0.0279517	2.38652
PqMYB58	0	0	0.977908
PqMYB59	10.8021	15.5597	37.3317
PqMYB60	0.0226873	0	2.38736
PqMYB61	0.01792	0	1.36907
PqMYB62	2.32323	0	0
PqMYB63	2.45096	0.084625	32.4834
PqMYB64	6.56201	0.421128	21.3008
PqMYB65	4.26786	0.752517	1.90036
PqMYB66	0.493986	2.99302	2.72636
PqMYB67	3.85146	0.778488	1.24132
PqMYB68	0	0	0.420412
PqMYB69	0	0	0
PqMYB70	44.2697	14.3869	28.961
PqMYB71	8.09465	6.2704	3.54919
PqMYB72	2.67691	1.34269	4.01278
PqMYB73	5.34904	0.490696	3.05581
PqMYB74	1.00617	0.136105	1.4962
PqMYB75	0.099902	0	0
PqMYB76	11.837	0.134834	1.18296
PqMYB77	0.0315733	0.138291	0.612936
PqMYB78	0.311762	0.0395287	9.15474
PqMYB79	10.8651	5.29408	8.08211
PqMYB80	0.10723	0.142869	1.07453
PqMYB81	1.41674	0.933024	3.26059
PqMYB82	1.36738	0.734873	2.10265
PqMYB83	0	0	0.383614
PqMYB84	0.691509	1.09046	0.123453
PqMYB85	0.134137	1.29082	0
PqMYB86	16.8346	2.87764	0
PqMYB87	19.0078	1.3721	0.356055
PqMYB88	0	0	2.66752
PqMYB89	8.49888	2.05925	6.74768
PqMYB90	0.0761303	0	0.781133
PqMYB91	0.297803	0	1.70137
PqMYB92	0.543663	0.032435	0.0587327
PqMYB93	0	0	10.0536
PqMYB94	0.855786	0.11127	0.157394
PqMYB95	14.1614	11.1265	19.9363
PqMYB96	0.0159243	0	2.44182
PqMYB97	0	0	0
PqMYB98	0	0	0.209457
PqMYB99	0.0759153	0.0228893	0
PqMYB100	0.28871	2.4398	0.0875137
PqMYB101	0.0480807	0	5.47294
PqMYB102	0	0	1.65036
PqMYB103	2.32035	8.64538	3.25928
PqMYB104	0.926949	0	0.02102
PqMYB105	0.259673	0	0.007526
PqMYB106	1.99825	0	0
PqMYB107	5.72828	0.881507	0.187887
PqMYB108	0.0761447	0.0747843	8.67038
PqMYB109	0.0995147	0.169273	0
PqMYB110	0.348828	0	1.06196
PqMYB111	9.80434	5.27448	5.45642
PqMYB112	0.880175	5.9462	25.2652
PqMYB113	3.0321	1.19488	1.31629
PqMYB114	0.139483	0.0554233	0.0120427
PqMYB115	10.3539	13.2565	27.3666
PqMYB116	0	0.0353587	2.60421
PqMYB117	2.84077	0.236343	2.51599
PqMYB118	0	0	0.336872
PqMYB119	3.39682	9.8421	0.223228
PqMYB120	0.0368113	0	2.18681
PqMYB121	75.3843	5.40726	3.6065
PqMYB122	5.02166	2.64625	6.41725
PqMYB123	43.6727	8.26696	2.92648
PqMYB124	8.30956	6.58346	8.78383
PqMYB125	4.68437	4.59212	5.91666
PqMYB126	0.196898	2.13969	3.36846
PqMYB127	0.489207	0	0.134629
PqMYB128	0.508262	0	0.126818
PqMYB129	2.72584	0.623653	1.44809
PqMYB130	35.2402	2.08516	0.0644647
PqMYB131	2.38047	0.812638	0.625565
PqMYB132	2.22768	2.72502	1.53747
PqMYB133	10.3514	9.44392	9.83606
PqMYB134	7.29473	5.20161	8.4861
PqMYB135	5.90787	3.21968	4.50222
PqMYB136	2.18296	0.857953	1.42117
PqMYB137	1.50756	0.685257	0.0373837
PqMYB138	0.208147	0.160669	0.0324433
PqMYB139	5.12347	2.76246	8.81242
PqMYB140	0	0	0.86516
PqMYB141	13.8188	6.01593	0.106034
PqMYB142	11.4278	2.00011	0.00958567
PqMYB143	12.9353	0.011076	0.02227
PqMYB144	0.561229	0.10234	0.914257
PqMYB145	0.191147	0	2.70263
PqMYB146	0.535323	0.37633	0.0446057
PqMYB147	0.910091	0.016806	0.290758
PqMYB148	0.0160567	0	3.25153
PqMYB149	0	0	1.33776
PqMYB150	0.218896	0.0655583	0.925585
PqMYB151	7.31919	8.72117	4.63991
PqMYB152	9.07545	0.330137	4.59767
PqMYB153	11.6605	3.28576	2.21825
PqMYB154	0.966167	0.151227	0.823531
PqMYB155	13.7064	0.360823	4.18821
PqMYB156	11.2075	8.59954	2.53294
PqMYB157	10.4391	15.7772	3.98334
PqMYB158	21.3994	0.911935	0.73843
PqMYB159	3.32312	1.68212	4.0027

## Sheet: Table S7
Table S7 Expression of R2R3-MYB at different time after MeJA treatment in PqMYBs
Name	CK	M2	M6	M12	M24
PqMYB1	0.964921	0.254983	0	0	0.349643
PqMYB2	15.6709	28.5881	4.61781	13.5709	16.2417
PqMYB3	3.06531	1.30727	2.6997	2.51247	2.38241
PqMYB4	0.267306	3.69229	2.81306	0	0.299376
PqMYB5	0	0	0	0	0
PqMYB6	5.16879	6.59725	5.17618	0	10.5182
PqMYB7	0	0	0.0408647	0	0
PqMYB8	0	0	0	0	0
PqMYB9	0.428503	0.375847	0.457905	0	0.567895
PqMYB10	0	0	0	0	0
PqMYB11	0	0	0	0	0
PqMYB12	0	0	0	0	0
PqMYB13	0.052166	0	0	0	0
PqMYB14	0.110639	0.823946	0.19566	0	0.044682
PqMYB15	0.119419	0.38288	0.286199	0	0.0813693
PqMYB16	0.844045	0	0.0894493	0	0.575978
PqMYB17	7.79062	5.04084	1.09701	9.12838	3.99988
PqMYB18	0.631928	0.231168	0.104469	0	0.0245663
PqMYB19	0	0	0	0	0
PqMYB20	0.420918	0	0	0	0.138942
PqMYB21	14.7817	22.8714	10.3911	17.0057	7.06022
PqMYB22	2.33452	0.791271	0.765925	0	0.664582
PqMYB23	0.118511	0	0.0425633	0	0.0514753
PqMYB24	0.329944	0.221726	0.694026	0	0.659425
PqMYB25	10.2125	2.5143	1.01078	0	0
PqMYB26	9.33351	38.0616	1.87196	0	5.26653
PqMYB27	0.771386	3.65331	0.135308	0	0.363417
PqMYB28	3.18089	1.26609	1.00501	0	2.42721
PqMYB29	2.1738	2.13583	1.01209	0	1.24241
PqMYB30	0.17458	0	0.181458	0	0.747356
PqMYB31	0.430755	0.0323743	0.215342	0	0.250532
PqMYB32	0	0	0.109435	0	0.0312697
PqMYB33	0.328114	0.119776	0	0	0.764287
PqMYB34	0	0	0	0	0
PqMYB35	0	0	0	0	0
PqMYB36	1.41476	1.25991	1.85026	0	1.37377
PqMYB37	0.011976	0	0	0	0
PqMYB38	0.373832	0.153319	0.446788	0	0.326197
PqMYB39	0	0	0	0	0.0461857
PqMYB40	0	0.639573	0	2.47011	0.0401253
PqMYB41	28.4102	79.0352	138.071	67.5031	27.2828
PqMYB42	0	0.199642	0	0	0
PqMYB43	0	0.878748	0	0	0.0153313
PqMYB44	6.27946	4.46291	1.21192	0	2.14435
PqMYB45	0	0	0.0203643	0	0
PqMYB46	2.61013	0.869609	0.32522	0	1.8867
PqMYB47	0.0214743	1.45712	0.270027	0	0.467782
PqMYB48	0.020231	0	0.00927333	0	0
PqMYB49	0.632231	0.160294	0.0963267	2.60779	0.208452
PqMYB50	1.385	0.969825	1.84292	2.20828	1.06335
PqMYB51	0.115616	0	0	0	0.236693
PqMYB52	0.096298	0	0.0361517	0	0.044728
PqMYB53	0.0851297	0	0.325907	0	0.00658767
PqMYB54	0.0581507	0	0.0722447	0	0.119716
PqMYB55	0.0259497	0	0	0	0.0115313
PqMYB56	3.58433	3.63568	5.44244	1.94376	5.00218
PqMYB57	3.42465	1.26868	2.42635	0	1.01912
PqMYB58	0	0	0.0806937	0	0.0515543
PqMYB59	0	0	0	0	0
PqMYB60	21.5339	14.4418	15.839	15.3003	28.5796
PqMYB61	0.0586943	0.0368413	0.105175	0	0.036861
PqMYB62	0	0	0.109199	0	0
PqMYB63	0.134795	0.154298	0.125997	0	0.128023
PqMYB64	0	0	0.089901	0	0.529932
PqMYB65	0.0926713	0.482365	1.20303	0	0.108926
PqMYB66	1.22412	0.132384	0.633129	0	1.50439
PqMYB67	14.9556	2.66503	7.53722	7.85495	13.3072
PqMYB68	0.752907	0.856849	0.485565	0	0.48379
PqMYB69	0	0	0	0	0
PqMYB70	0	0	0	0	0
PqMYB71	23.6104	30.6396	13.8255	13.3525	16.1133
PqMYB72	21.2851	6.13684	2.84504	17.2617	21.1992
PqMYB73	1.69994	0.975461	1.60965	0.297218	2.34223
PqMYB74	0.23196	0.037437	2.96535	0	0.228179
PqMYB75	0.535831	0	0.272942	0	0.683941
PqMYB76	0.130449	0	0.024405	0	0.249775
PqMYB77	0	0	0	0	0
PqMYB78	0	0	0.235388	0	0
PqMYB79	0	0	0	0	0.0244243
PqMYB80	0	0	0.0501973	0	0
PqMYB81	26.3586	32.4651	11.2296	28.5861	15.7834
PqMYB82	11.1357	6.05988	19.3611	3.16058	17.1064
PqMYB83	0	0	0.431322	0	0
PqMYB84	30.125	17.3596	4.3751	24.5624	22.4543
PqMYB85	0.764009	0.214184	0.496388	0	1.2975
PqMYB86	0.550912	0.349511	0.57495	0	1.10006
PqMYB87	0	0	0	0	0
PqMYB88	1.62089	6.11933	5.71945	0.303785	2.44392
PqMYB89	0.164191	0	0	0	0.0182077
PqMYB90	11.0548	37.1024	20.3272	5.01457	6.14106
PqMYB91	1.17015	0	0.624495	0	1.903
PqMYB92	1.51852	0.0727537	0.312369	0	1.18593
PqMYB93	0.072534	0	0	0	0
PqMYB94	1.07121	1.57492	6.63003	0	1.77724
PqMYB95	0	0	0	0	0
PqMYB96	0.303594	0	0.593032	0	0.043076
PqMYB97	0	0	0	0	0
PqMYB98	0	0	0	0	0
PqMYB99	0	0	0	0	0.0638303
PqMYB100	2.18616	0.711781	1.20117	0	1.93126
PqMYB101	21.9674	30.1027	19.7586	5.10554	22.7871
PqMYB102	0	0	0.0628933	0	0.018922
PqMYB103	0	0	0	0	0
PqMYB104	0.050597	0	0.0477863	0	0.0126043
PqMYB105	0	0	0.195686	0	0
PqMYB106	6.45659	16.4408	3.29556	0	3.40598
PqMYB107	0	0	0	0	0
PqMYB108	0	0	0	0	0
PqMYB109	8.33935	6.33214	5.32351	4.15519	4.99682
PqMYB110	0	0.12477	0	0	0.0195183
PqMYB111	0	0	0	0	0
PqMYB112	0	0	0	0	0
PqMYB113	0.636545	0.220154	0.0854117	0	0.236603
PqMYB114	0.01989	0	0.0601727	0	0.0555043
PqMYB115	4.40942	1.18078	0.131599	0	0
PqMYB116	0	0	0	0	0
PqMYB117	17.1919	8.20592	28.2246	7.49245	19.2557
PqMYB118	7.34425	3.00269	1.54558	8.91469	4.89973
PqMYB119	1.79757	0.938539	0.618165	0	1.11911
PqMYB120	0	0	0	0	0.0123447
PqMYB121	24.3904	34.1056	46.3858	27.2393	27.5411
PqMYB122	0	0	0.0161853	0	0.0166057
PqMYB123	0.333671	0.0948143	0.693025	0	0.089768
PqMYB124	0	0	0	0	0.025653
PqMYB125	38.6237	42.6145	15.1176	6.95238	21.3379
PqMYB126	0	0	0	0	0.0194623
PqMYB127	16.3413	17.7915	15.0599	23.4276	11.5955
PqMYB128	3.29215	1.28328	4.64343	1.41754	2.80549
PqMYB129	14.6412	34.0253	15.8299	18.717	22.4412
PqMYB130	13.0159	2.80288	20.5272	5.66742	17.3929
PqMYB131	7.80517	14.649	3.27387	24.3311	9.83571
PqMYB132	3.9011	0	2.98164	0	3.40972
PqMYB133	0	0	0	0	0
PqMYB134	0	0	0	0	0
PqMYB135	0.900773	0.443733	0.822756	0	0.651798
PqMYB136	10.736	15.6811	4.94739	11.7853	6.78725
PqMYB137	1.87937	1.1518	0.965505	1.37067	1.0181
PqMYB138	2.91496	5.69841	1.70304	0	1.56019
PqMYB139	12.3266	12.2199	4.80617	9.80794	11.4084
PqMYB140	5.23214	0.681923	4.66722	11.4809	5.14356
PqMYB141	3.24551	1.59892	2.45759	0	2.83978
PqMYB142	1.32938	1.93735	0.753214	0	1.36606
PqMYB143	1.45921	3.22607	1.01055	10.5419	1.94932
PqMYB144	4.78866	0.295577	0.359447	0	1.68195
PqMYB145	2.7375	6.87812	13.396	4.29554	4.75954
PqMYB146	0	0	0	0	0
PqMYB147	6.71587	4.62257	1.82642	10.4094	5.27605
PqMYB148	7.9772	9.28022	5.13834	4.00325	4.36656
PqMYB149	0	0	0	0	0
PqMYB150	0.0748193	0	0.367043	0	0
PqMYB151	0.0183867	0	0	0	0
PqMYB152	0.436457	0	0.44327	0	0.449429
PqMYB153	0	0	0	0	0.142347
PqMYB154	0	0	0	0	0
PqMYB155	0.0218407	0	0	0	0
PqMYB156	0.131431	0.344774	0.25517	0	0.122137
PqMYB157	20.2414	24.0098	15.8151	11.1659	13.429
PqMYB158	0.402837	0	0.392238	0	0.123881
PqMYB159	4.78733	13.0379	4.06012	19.2509	5.59739

## Sheet: Table S8
Table S8. The primers list used for qRT-PCR.
Gene name	Primer sequence (5’-3’)
PqMYB2	F:GTTGCAGACTCCGATGGACA
	R:CGCCATCGCAGACCATCTAT
PqMYB25	F:CCCAAGGGAGCTTTGAGGTT
	R:AGCAGGTGGTACAAGATCGC
PqMYB46	F:GGAAATAGGAGGGCGCAGTT
	R:GCTTTGTGCCCTTCCTTGTG
PqMYB72	F:ATGTGGGAAGAGTTGCAGGC
	R:GAGCTTGTGAAGGCGGATGA
PqMYB84	F:GGCCTCCATGCTGTGACAAA
	R:CCGGGACCATGTTCTTGGAT
GAPDH	F:CAAAGACTGGAGAGGTGGAAGAG
	R:TGCAGGTAGCACTTTACCAACAG
PqANS4	F:ACCAGCATCGGCAACATATTCG
	R:GAATCGCTTTGTCCTCGGAACC
PqHCT14	F:ATTTCTACAACCCGCCTTCTAATGG
	R:GCCTTCTTCATCTCTGCCTAACC
PqCCoAOMT10	F:AGATATGGAGGGCACTGGCTTAG
	R:TCCGAGGCTAGGCTATTGTTCAG
PqCHS	F:TGACTGGGCACTATCAGAGGATG
	R:CTTGAAAGGTCCGTTGGCAGAG
PqF3'H2	F:TGGATTTGGTGGTTGGTCAAGATAG
	R:GAGAGTGGAGTAGAAGGATGGAGTC

## Sheet: Table S9
Table S9 Gene annotation of flavonoid pathway in P. quinquefolius
Gene ID	Name in flavonoid pathway
q37084.t1	PqHCT1
q37187.t1	PqHCT2
q37731.t1	PqHCT3
q38274.t1	PqCHS
q38314.t1	PqHCT4
q27346.t1	PqHCT5
q28444.t1	PqCHS1
q28445.t1	PqCHS2
q60159.t1	PqHCT6
q60203.t1	PqHCT7
q60208.t1	PqHCT8
q60209.t1	PqHCT9
q60682.t1	PqDFR1
q60683.t1	PqDFR2
q60740.t1	CCoAOMT1
q30719.t1	PqHCT10
q31017.t1	PqHCT11
q31018.t1	PqHCT12
q31839.t1	PqHCT13
q31983.t1	PqCCoAOMT2
q14977.t1	PqCHS3
q15197.t1	PqCCoAOMT3
q61536.t1	PqCCoAOMT4
q62059.t1	PqCCoAOMT5
q62568.t1	PqANS1
q62618.t1	PqCHI1
q4835.t1	PqF3H1
q4866.t1	PqF3H2
q5778.t1	PqHCT14
q5792.t1	PqHCT15
q8193.t1	PqCYP1
q8424.t1	PqCHI2
q46740.t1	PqHCT16
q47978.t1	PqCHS4
q48330.t1	PqFLS1
q49881.t1	PqF3'H1
q49882.t1	PqF3'H2
q51827.t1	PqHCT17
q53058.t1	PqDFR3
q32443.t1	PqC4H1
q33943.t1	PqHCT18
q22724.t1	PqC12RT1
q23763.t1	PqCCoAOMT6
q24758.t1	PqF3'H3
q24944.t1	PqANS2
q25125.t1	PqHCT19
q25127.t1	PqHCT20
q8984.t1	PqCCoAOMT7
q10374.t1	PqHCT21
q10515.t1	PqCCoAOMT8
q1858.t1	PqCYP2
q2334.t1	PqCHI3
q3780.t1	PqANS3
q4194.t1	PqHCT22
q4203.t1	PqANS4
q4316.t1	PqF3'H4
q41409.t1	PqCCoAOMT9
q41642.t1	PqHCT23
q41663.t1	PqHCT24
q41664.t1	PqHCT25
q41665.t1	PqHCT26
q64104.t1	PqHCT27
q65125.t1	PqCHS5
q65495.t1	PqFLS2
q65496.t1	PqFLS3
q66523.t1	PqF3'H5
q66524.t1	PqF3'H6
q18950.t1	PqC4H2
q20299.t1	PqHCT28
q20303.t1	PqHCT29
q20480.t1	PqHCT30
q21434.t1	PqHCT31
q21435.t1	PqHCT32
q21654.t1	PqHCT33
q21864.t1	PqCYP3
q10855.t1	PqHCT34
q11519.t1	PqHCT35
q12122.t1	PqHCT36
q12123.t1	PqHCT37
q12124.t1	PqHCT38
q44000.t1	PqCCoAOMT10
q44564.t1	PqCHS6
q44949.t1	PqHCT39
q16754.t1	PqHCT40
q17234.t1	PqHCT41
q17723.t1	PqCHS7
q17724.t1	PqCHS8
q17725.t1	PqCHS9
q18347.t1	PqCCoAOMT11
q39769.t1	PqHCT42
q45591.t1	PqCCoAOMT12
q63753.t1	PqHCT43
q50311.t1	PqHCT44

## Sheet: Table S10
Table S10. The primers list used for subcellular localization analysis
Gene name	Primer sequence (5’-3’)
PqMYB2	F:ATGGGAAGGTCCCCTTGTTGTGAGAA
	R:GGCTTCTGTACCCTAAAAACTCATAGCC
PqMYB46	F:ATGGGCCGTTCACCTTGCTG
	R:TCAACAACATCTGTAAAACCCAC
PqMYB72	F:ATGGGAAGGTCCCCTTGCTG
	R:TCATTTCATCTCCAAGCTTCTGTAA
PqMYB2-YFP	F:cagtctctctctccaagcttATGCATGCTCGAGCGGCC
	R:ctcaccatactagtgagctcGTAACGGCCGCCAGTGTG
PqMYB46-YFP	F:accagtctctctctaagcttATGGGCCGTTCACCTTGCT
	R:ctcaccatactagtgagctcACAACATCTGTAAAACCCACTT
PqMYB72-YFP	F:cagtctctctctccaagcttATGCATGCTCGAGCGGCC
	R:ctcaccatactagtgagctcTTTCATCTCCAAGCTTCTGTAA
